# Supplementary material for: Synthesis of CuO nano/micro-crystals with controlled dimensionality and morphology and their electrochemical properties
Source: Royal Society of Chemistry journal article supplement (doi:10.1039/c3ce40887f), 2013-01-01
Supplement: c3ce40887f.pdf [file c3ce40887f.pdf]

# Synthesis of CuO Nano/Micro-Crystals with Controlled Dimensionality and Morphology and Their Electrochemical Properties

*Guanhua Lin<sup>\*a</sup>, Wensheng Lu<sup>b</sup> and Wenjie Dong<sup>b</sup>*

a Optics of Hybrid Nanostructures Group, Institute of Physics, Nicolaus Copernicus  
University, Grudziadzka 5/7, 87-100 Torun, Poland.

b Beijing National Laboratory for Molecular Sciences, Key Laboratory of Colloids  
and Surfaces, Institute of Chemistry, Chinese Academy of Sciences, Beijing 100190,  
People's Republic of China

\*Corresponding author. E-mail: [linguanhua01@gmail.com](mailto:linguanhua01@gmail.com)

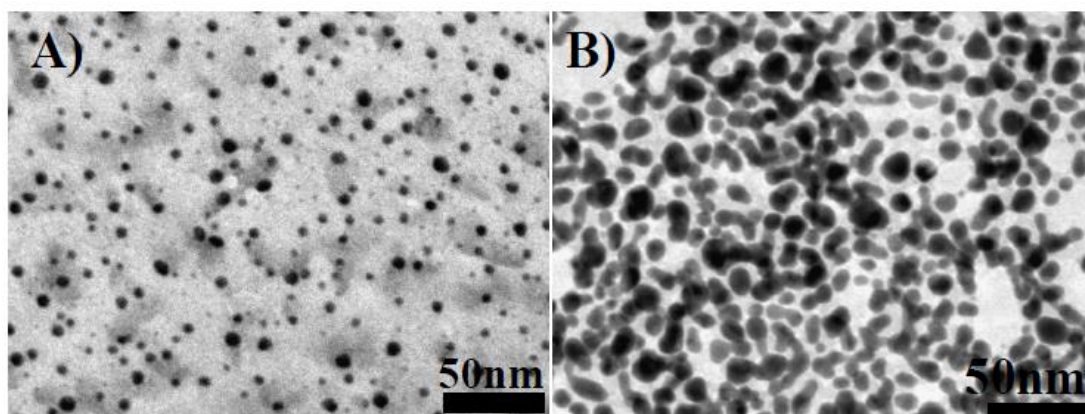

**Figure S1.** TEM images of CuO microsheets formed at 80 °C and 0.5 M NaOH without C18N3 at reaction times of (A) 1 min and (B) 60 min.

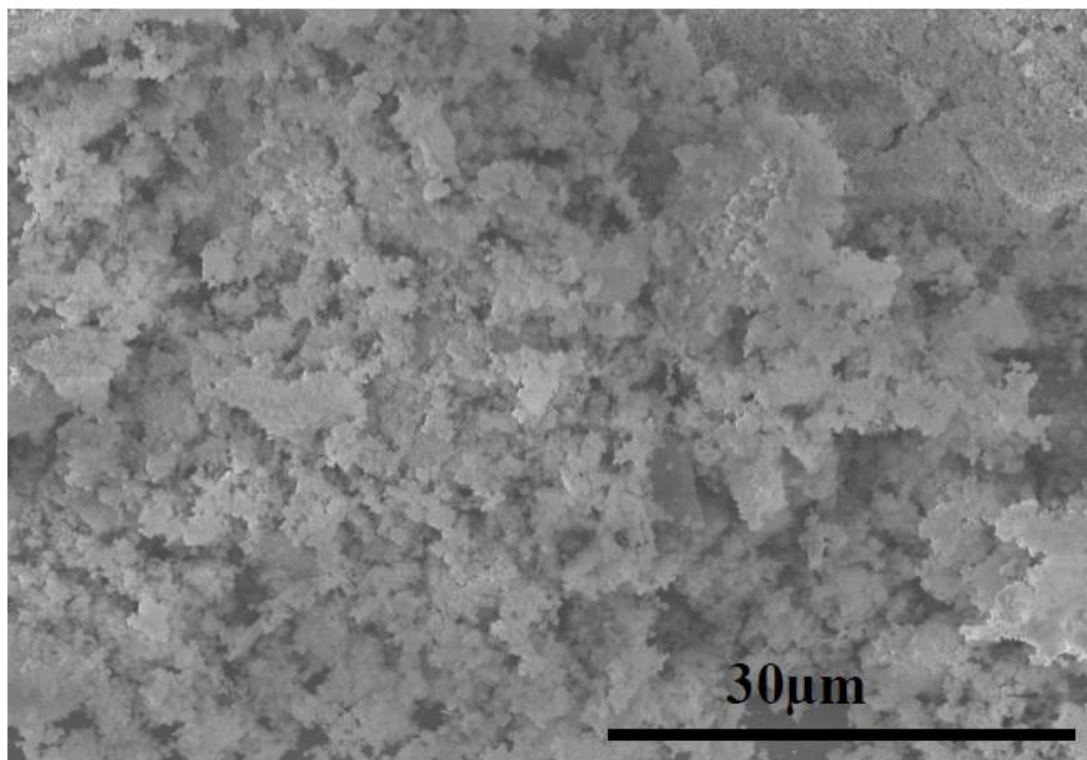

**Figure S2.** SEM images of CuO microstructures obtained at 80 °C and 0.5M NaOH, without C18N3.
